# Supplementary material
Source: Springer Nature journal article supplement (https://www.springermedizin.de/resource/supplementary/12984_2011_370_MOESM4_ESM.pdf/9605906)

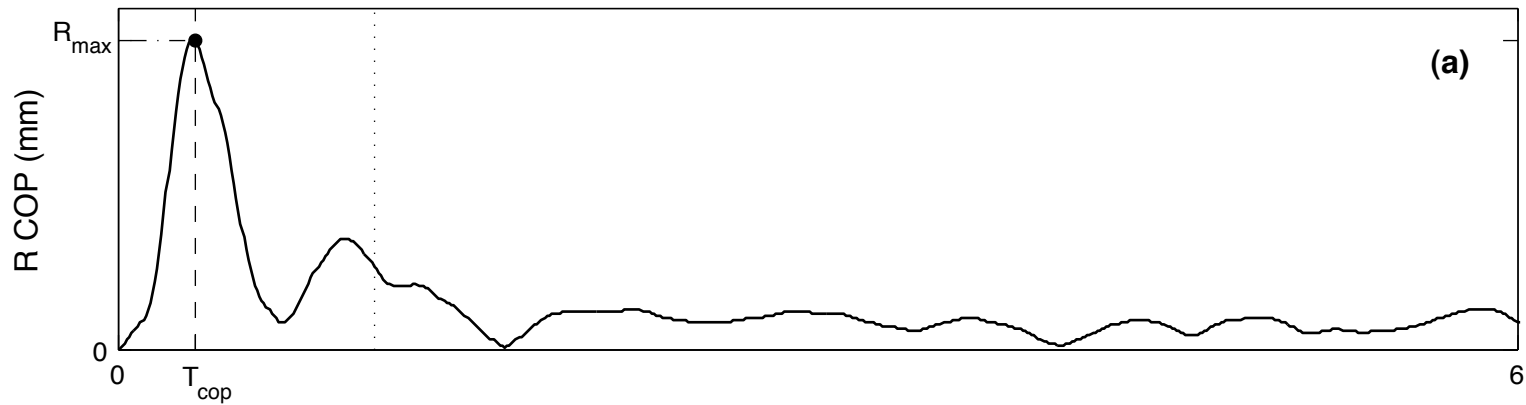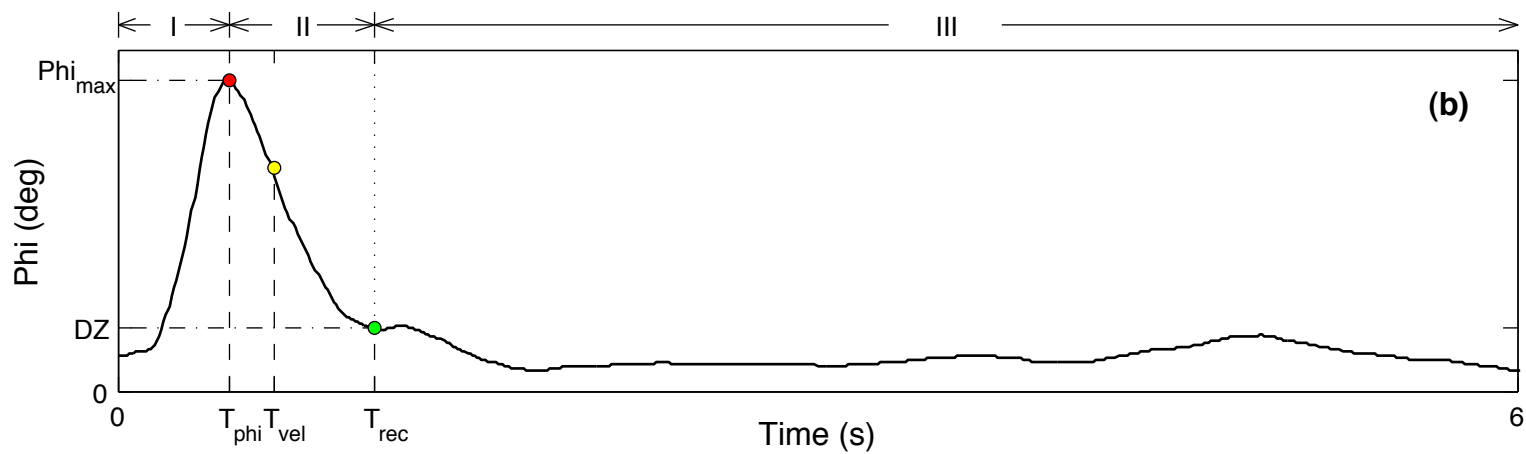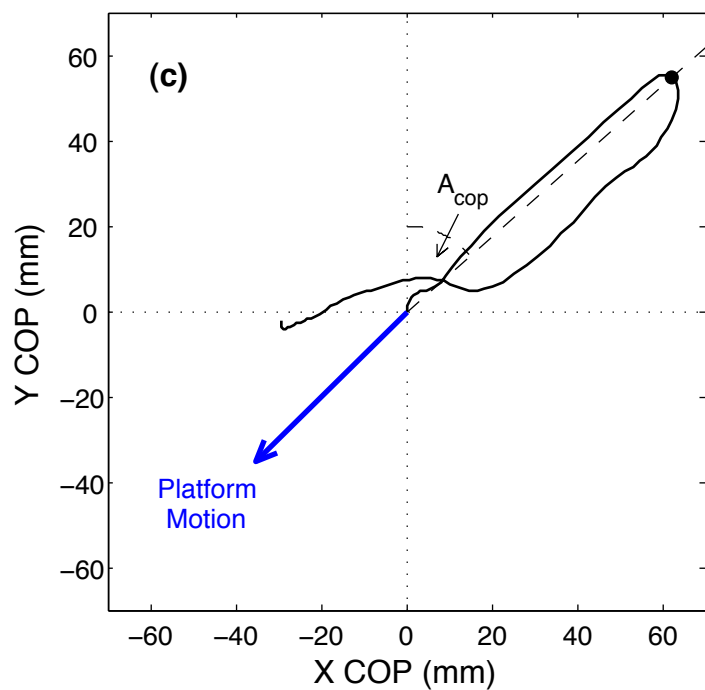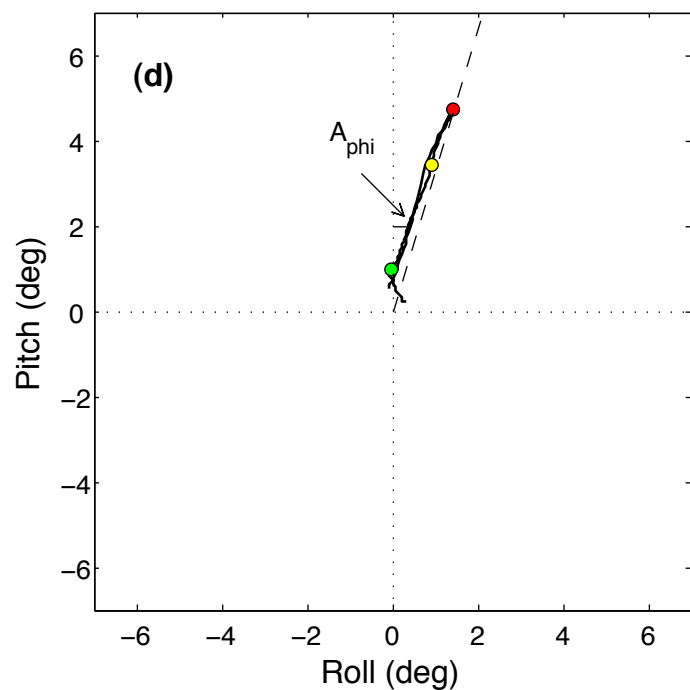

Supplement: MOESM4 [file 9605906]
